# Supplementary material for: Nanomedicine: Insights from a Bibliometrics-Based Analysis of Emerging Publishing and Research Trends
Source: MDPI journal article supplement (doi:10.3390/medicina55120785), 2019-12-15
Supplement: s1 [file s1]

# Nanomedicine: Insights from a Bibliometrics-Based Analysis of Emerging Publishing and Research Trends

**Supplementary Table S1.** List of university institutions/organizations or research centers with more than 5 articles published in the field of nano-medicine.

| University<br>Institution/Organization<br>or Research Center                                               | City        | Country               | Number of<br>Documents |
|------------------------------------------------------------------------------------------------------------|-------------|-----------------------|------------------------|
| Center for Nanoscience<br>and Nanotechnology, Tel<br>Aviv University                                       | Tel Aviv    | Israel                | 5                      |
| Center of Excellence for<br>Advanced Materials<br>Research, King<br>Abdulaziz University                   | Jeddah      | Saudi Arabia          | 6                      |
| Department of<br>Bioengineering,<br>Graduate School of<br>Engineering, The<br>University of Tokyo          | Tokyo       | Japan                 | 5                      |
| Department of<br>Biomedical Engineering<br>and Environmental<br>Sciences, National Tsing<br>Hua University | Hsinchu     | Taiwan                | 5                      |
| Department of<br>Biomedical Engineering,<br>College of Engineering,<br>Peking University                   | Beijing     | China                 | 13                     |
| Department of<br>Biomedical Engineering,<br>University of Southern<br>California                           | Los Angeles | California,<br>USA    | 5                      |
| Department of Chemical<br>Engineering,<br>Northeastern University                                          | Boston      | Massachusetts,<br>USA | 8                      |
| Department Of<br>Pharmaceutical Sciences,<br>University Of Nebraska<br>Medical Center                      | Omaha       | Nebraska, USA         | 5                      |
| Department of<br>Pharmaceutics, College<br>of Pharmacy, Third<br>Military Medical<br>University            | Chongqing   | China                 | 5                      |
| Department of<br>Pharmaceutics, Utrecht<br>Institute for<br>Pharmaceutical Sciences,<br>Utrecht University | Utrecht     | The<br>Netherlands    | 5                      |

|                                                                                                                                                  |          |               |    |
|--------------------------------------------------------------------------------------------------------------------------------------------------|----------|---------------|----|
| Department of Pharmacology and Experimental Neuroscience, University Of Nebraska Medical Center                                                  | Omaha    | Nebraska, USA | 5  |
| Drug Applied Research Center, Tabriz University of Medical Sciences                                                                              | Tabriz   | Iran          | 10 |
| Immunology Research Center, Tabriz University of Medical Sciences                                                                                | Tabriz   | Iran          | 6  |
| Jiangsu Key Laboratory of Translational Research and Therapy for Neuro-Psycho-Diseases, College of Pharmaceutical Sciences, Soochow University   | Suzhou   | China         | 5  |
| Laboratory of Molecular Imaging and Nanomedicine, National Institute of Biomedical Imaging and Bioengineering, National Institutes of Health     | Bethesda | Maryland, USA | 22 |
| Nanotechnology Research Center, Faculty of Pharmacy, Tehran University of Medical Sciences                                                       | Tehran   | Iran          | 6  |
| Pharmaceutical Research Center, Mashhad University of Medical Sciences                                                                           | Mashhad  | Iran          | 5  |
| State Key Laboratory for Modification of Chemical Fibers and Polymer Materials, College of Materials Science and Engineering, Donghua University | Shanghai | China         | 7  |
| State Key Laboratory of High Performance Ceramics and Superfine Microstructure, Shanghai Institute of Ceramics, Chinese Academy of Sciences      | Shanghai | China         | 5  |

|                                                                                                            |          |         |    |
|------------------------------------------------------------------------------------------------------------|----------|---------|----|
| Université Catholique de Louvain, Louvain Drug Research Institute, Advanced Drug Delivery And Biomaterials | Brussels | Belgium | 5  |
| University of Chinese Academy of Sciences                                                                  | Beijing  | China   | 24 |

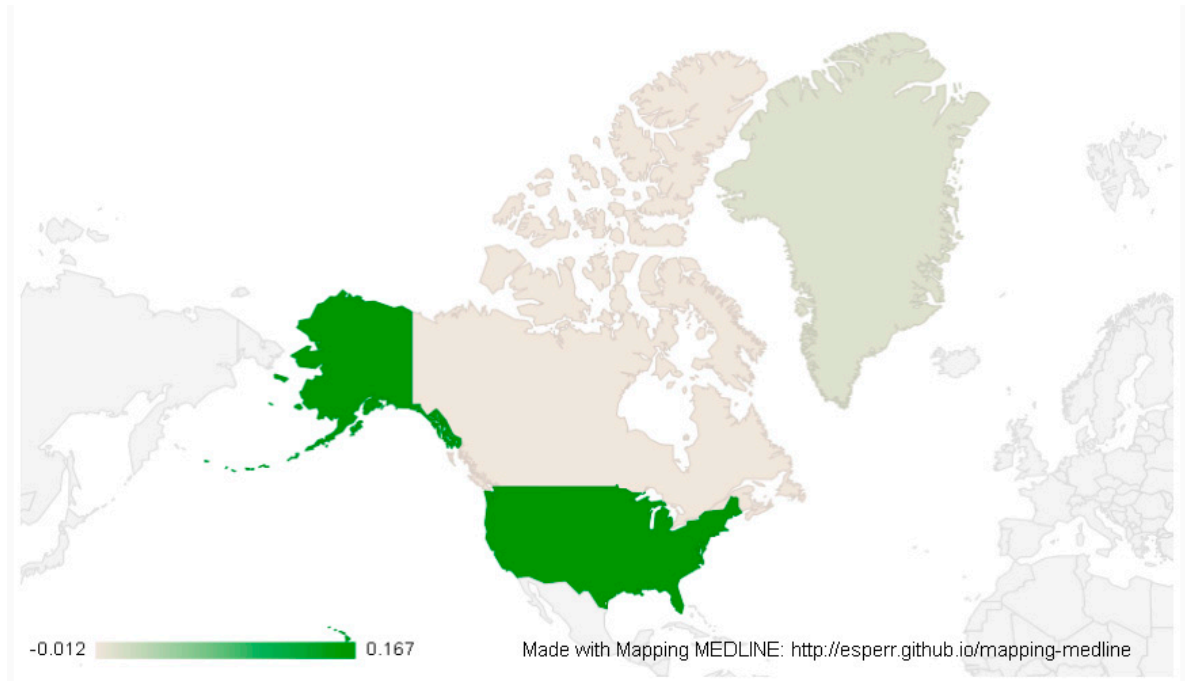

**Supplementary Figure S1.** Publishing and research trends in the field of nano-medicine for North America.

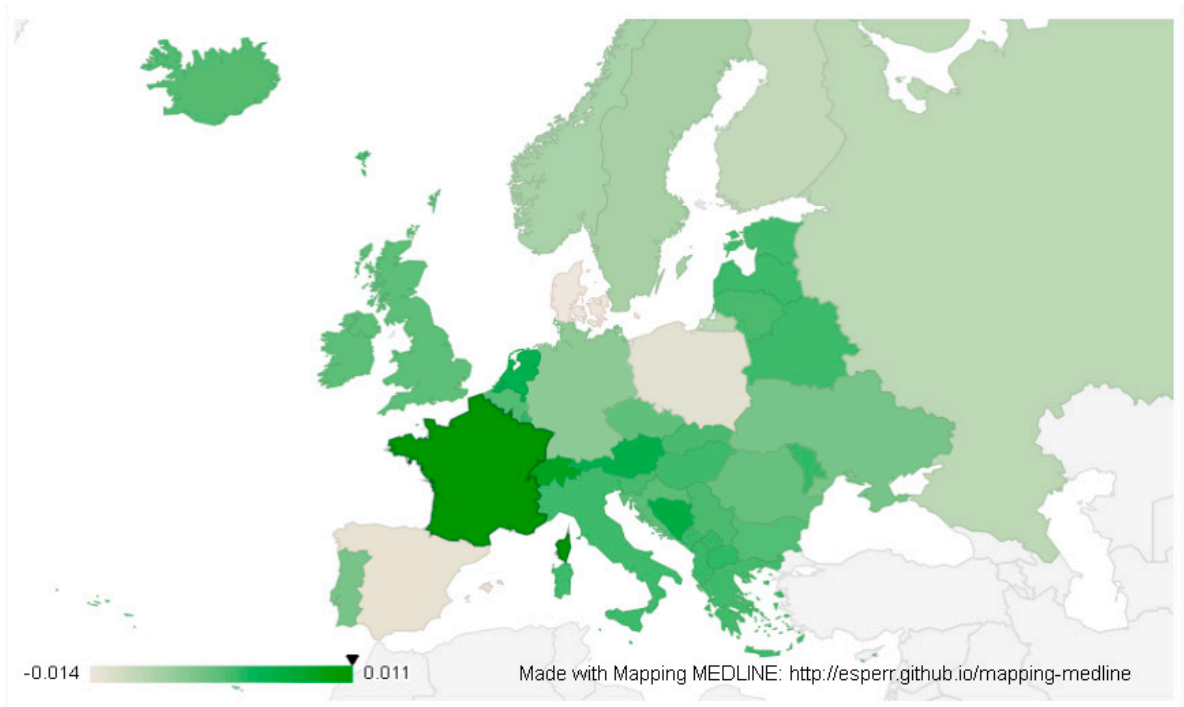

**Supplementary Figure S2.** Publishing and research trends in the field of nano-medicine for Europe.

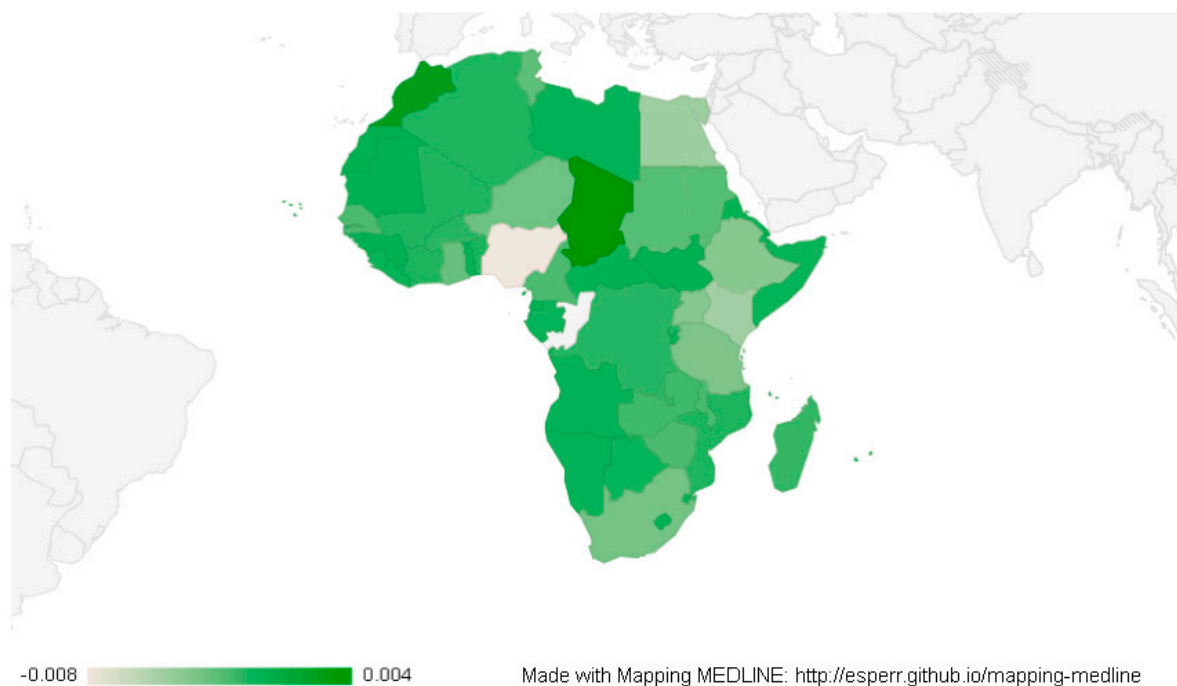

**Supplementary Figure S3.** Publishing and research trends in the field of nano-medicine for Africa.

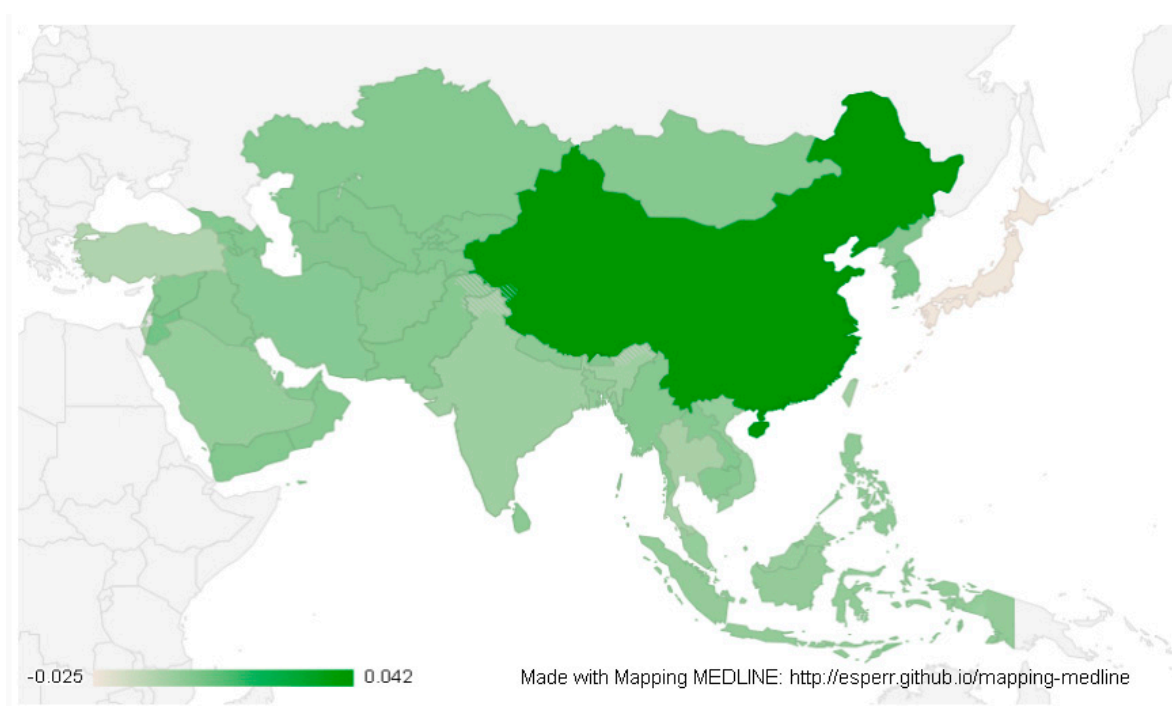

**Supplementary Figure S4.** Publishing and research trends in the field of nano-medicine for Asia.

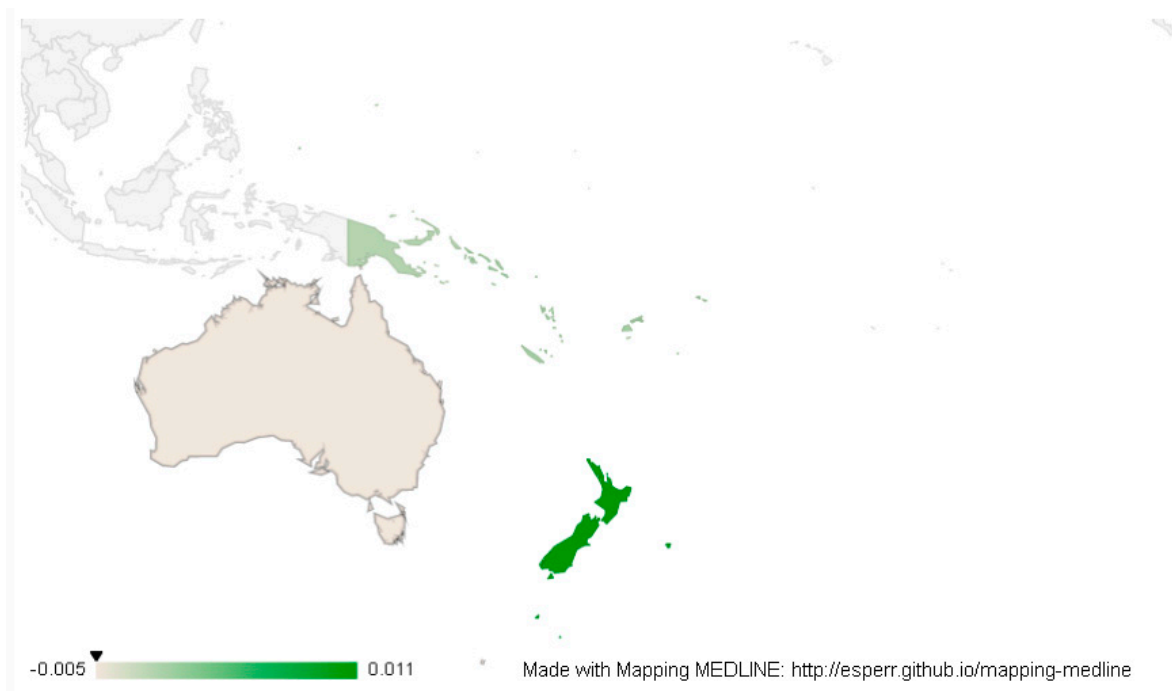

**Supplementary Figure S5.** Publishing and research trends in the field of nano-medicine for Oceania.
